# Supplementary material
Source: publisher figshare collection journal article supplement (https://brill.figshare.com/articles/dataset/_/7301824)
Supplement: Supplementary file 2 [file 1]

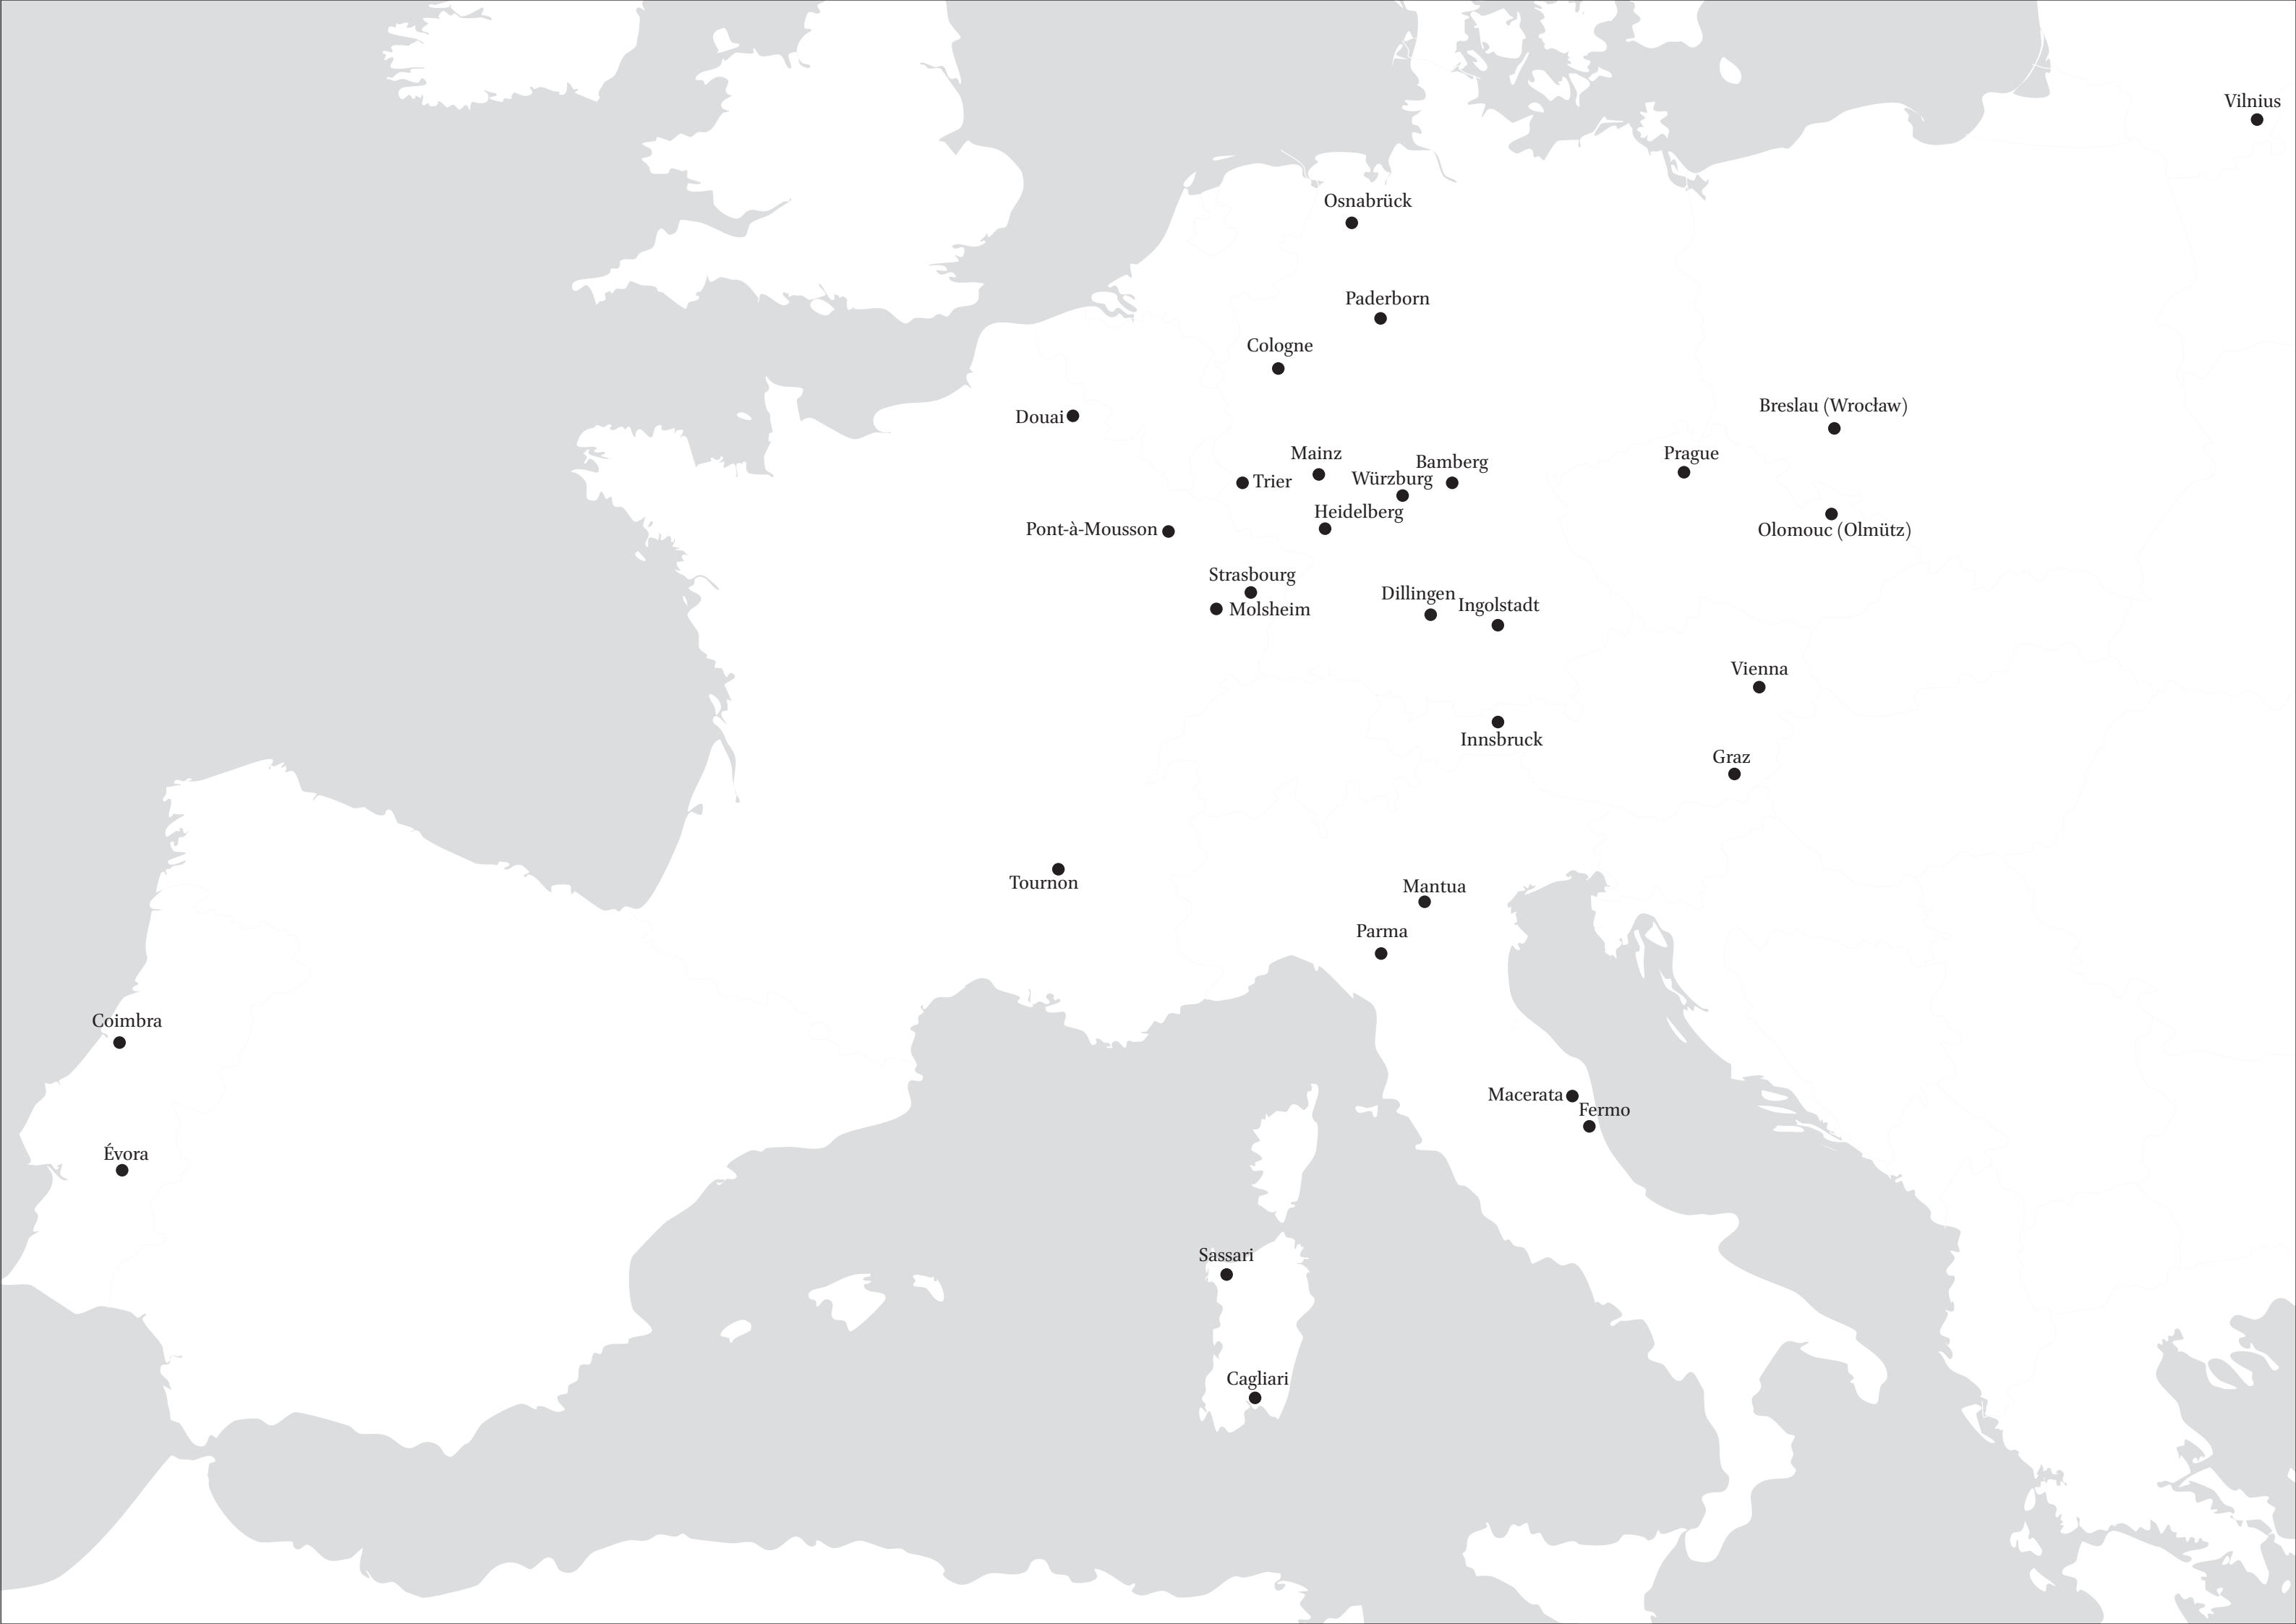

Vilnius

Osnabrück

Paderborn

Cologne

Breslau (Wrocław)

Douai

Prague

Mainz

Bamberg

Trier

Würzburg

Pont-à-Mousson

Heidelberg

Strasbourg

Dillingen

Ingolstadt

Molsheim

Vienna

Innsbruck

Graz

Tournon

Mantua

Parma

Coimbra

Évora

Macerata

Fermo

Sassari

Cagliari
