# Supplementary material
Source: publisher figshare collection journal article supplement (https://brill.figshare.com/articles/dataset/_/7301824)

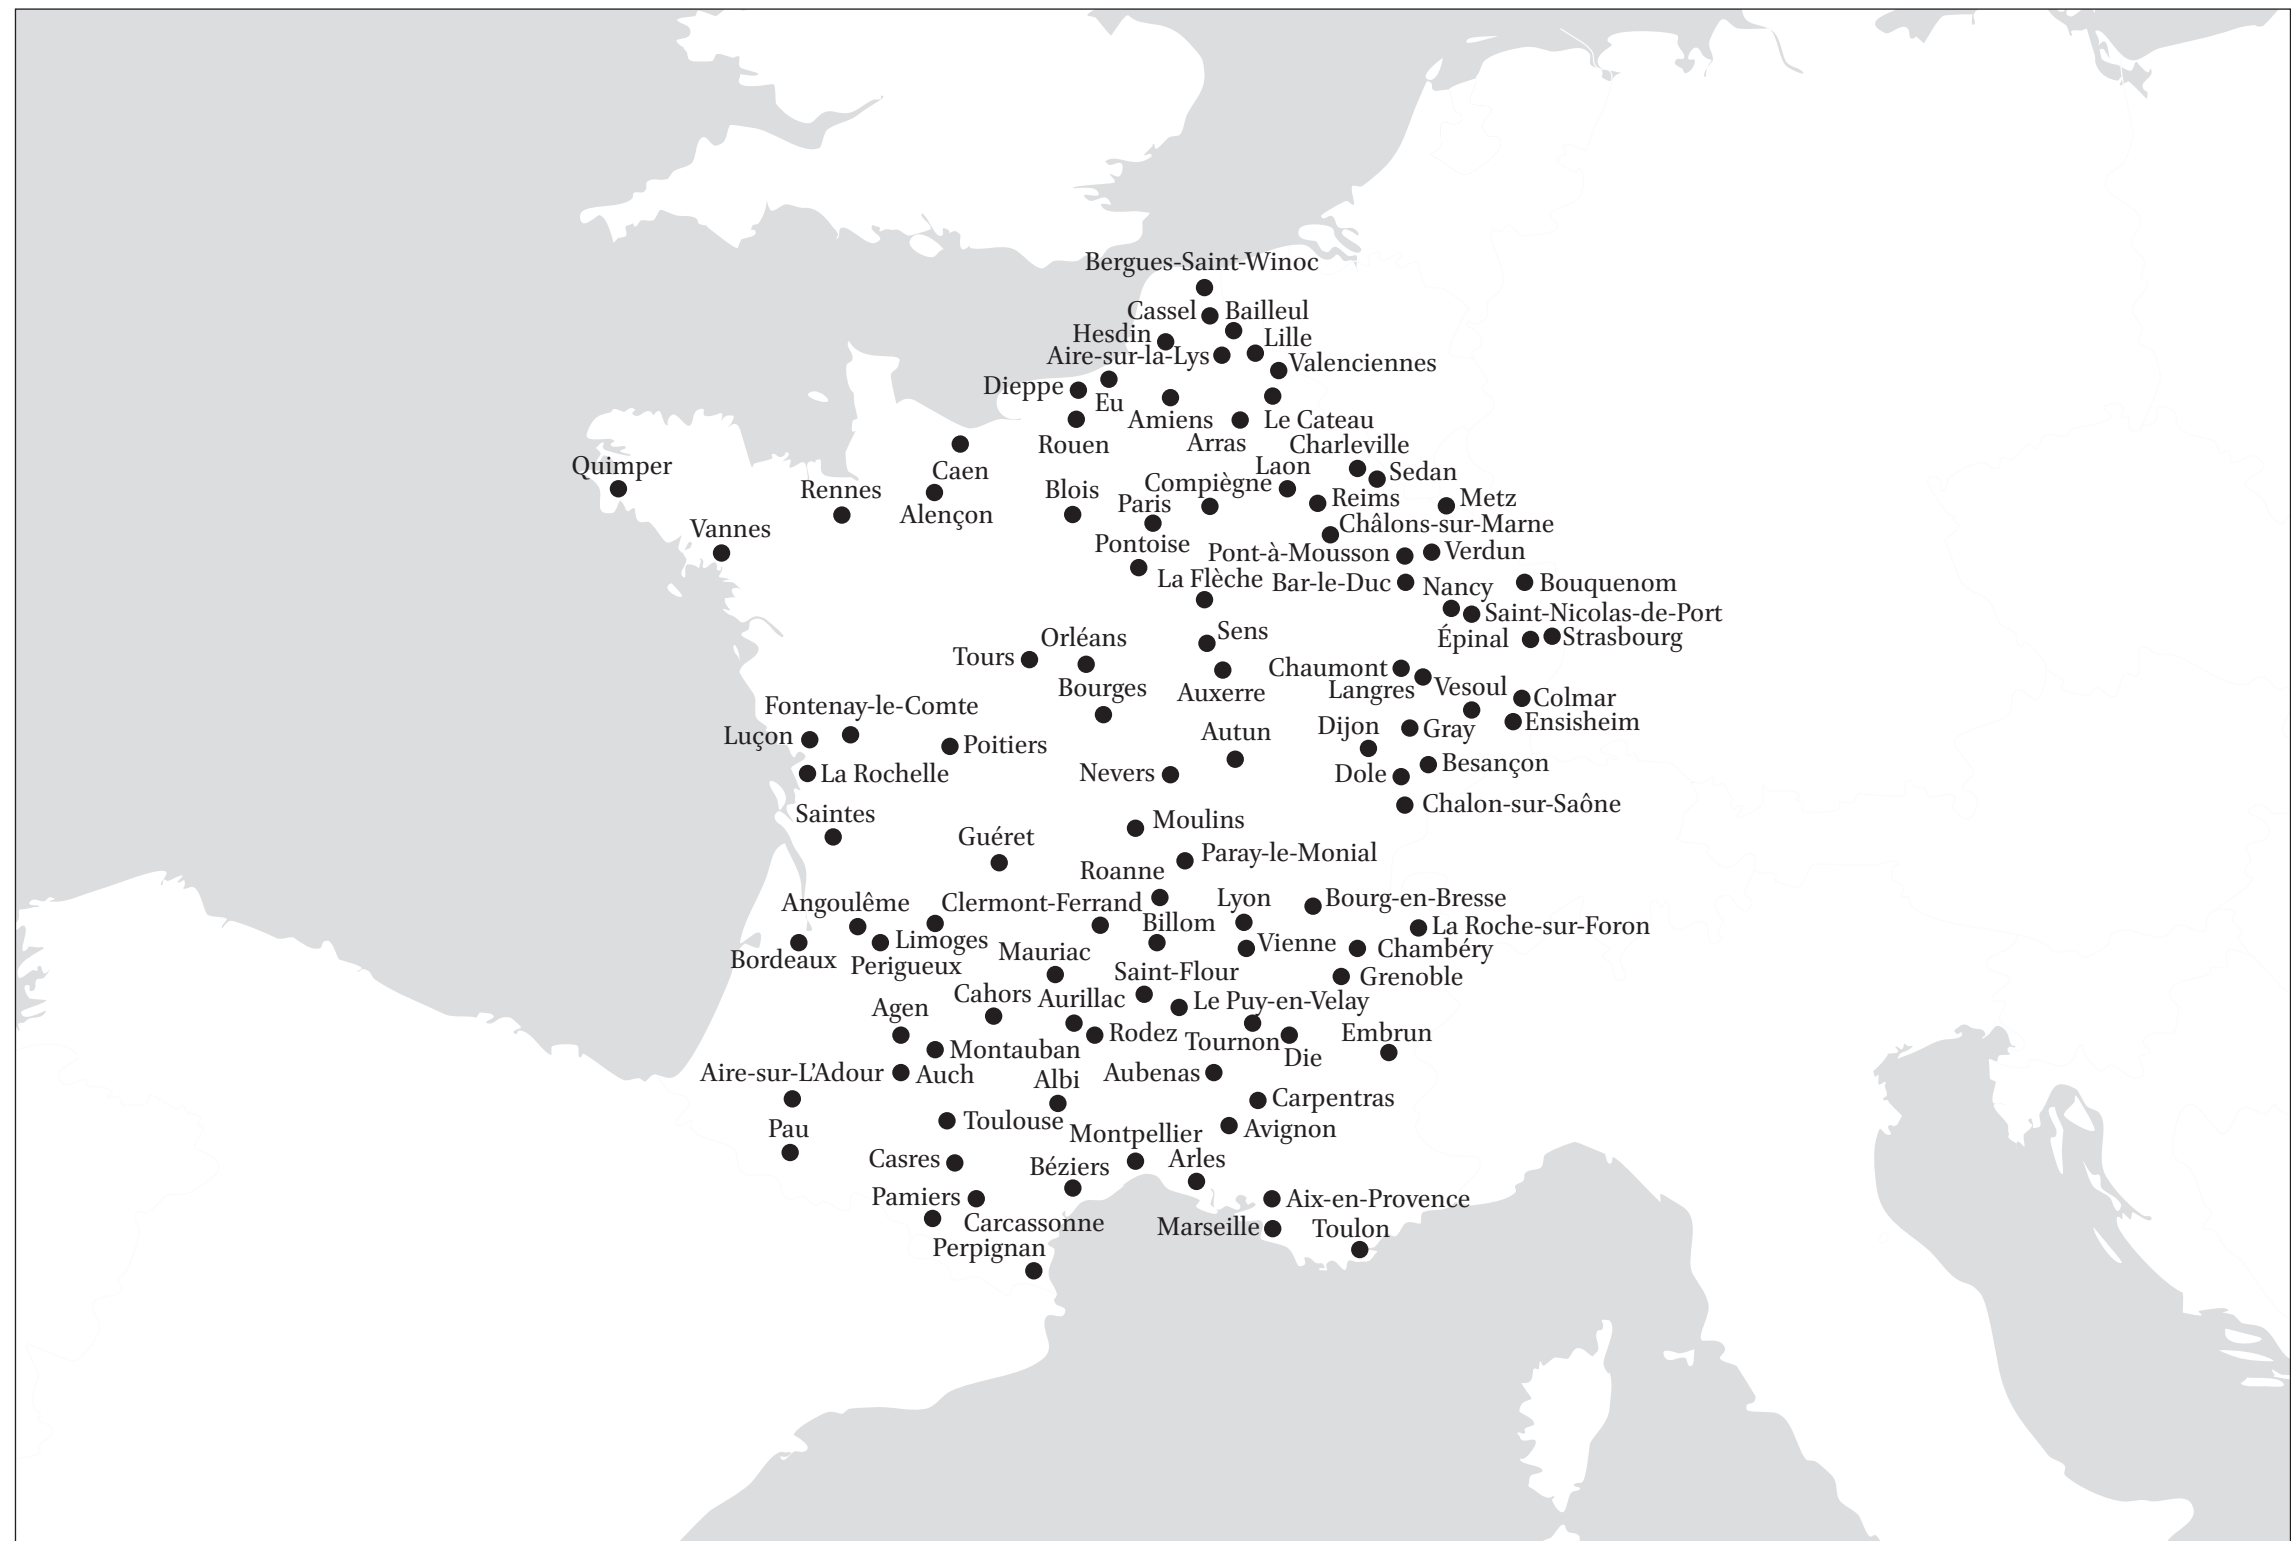

Supplement: Supplementary file 1 [file 1]

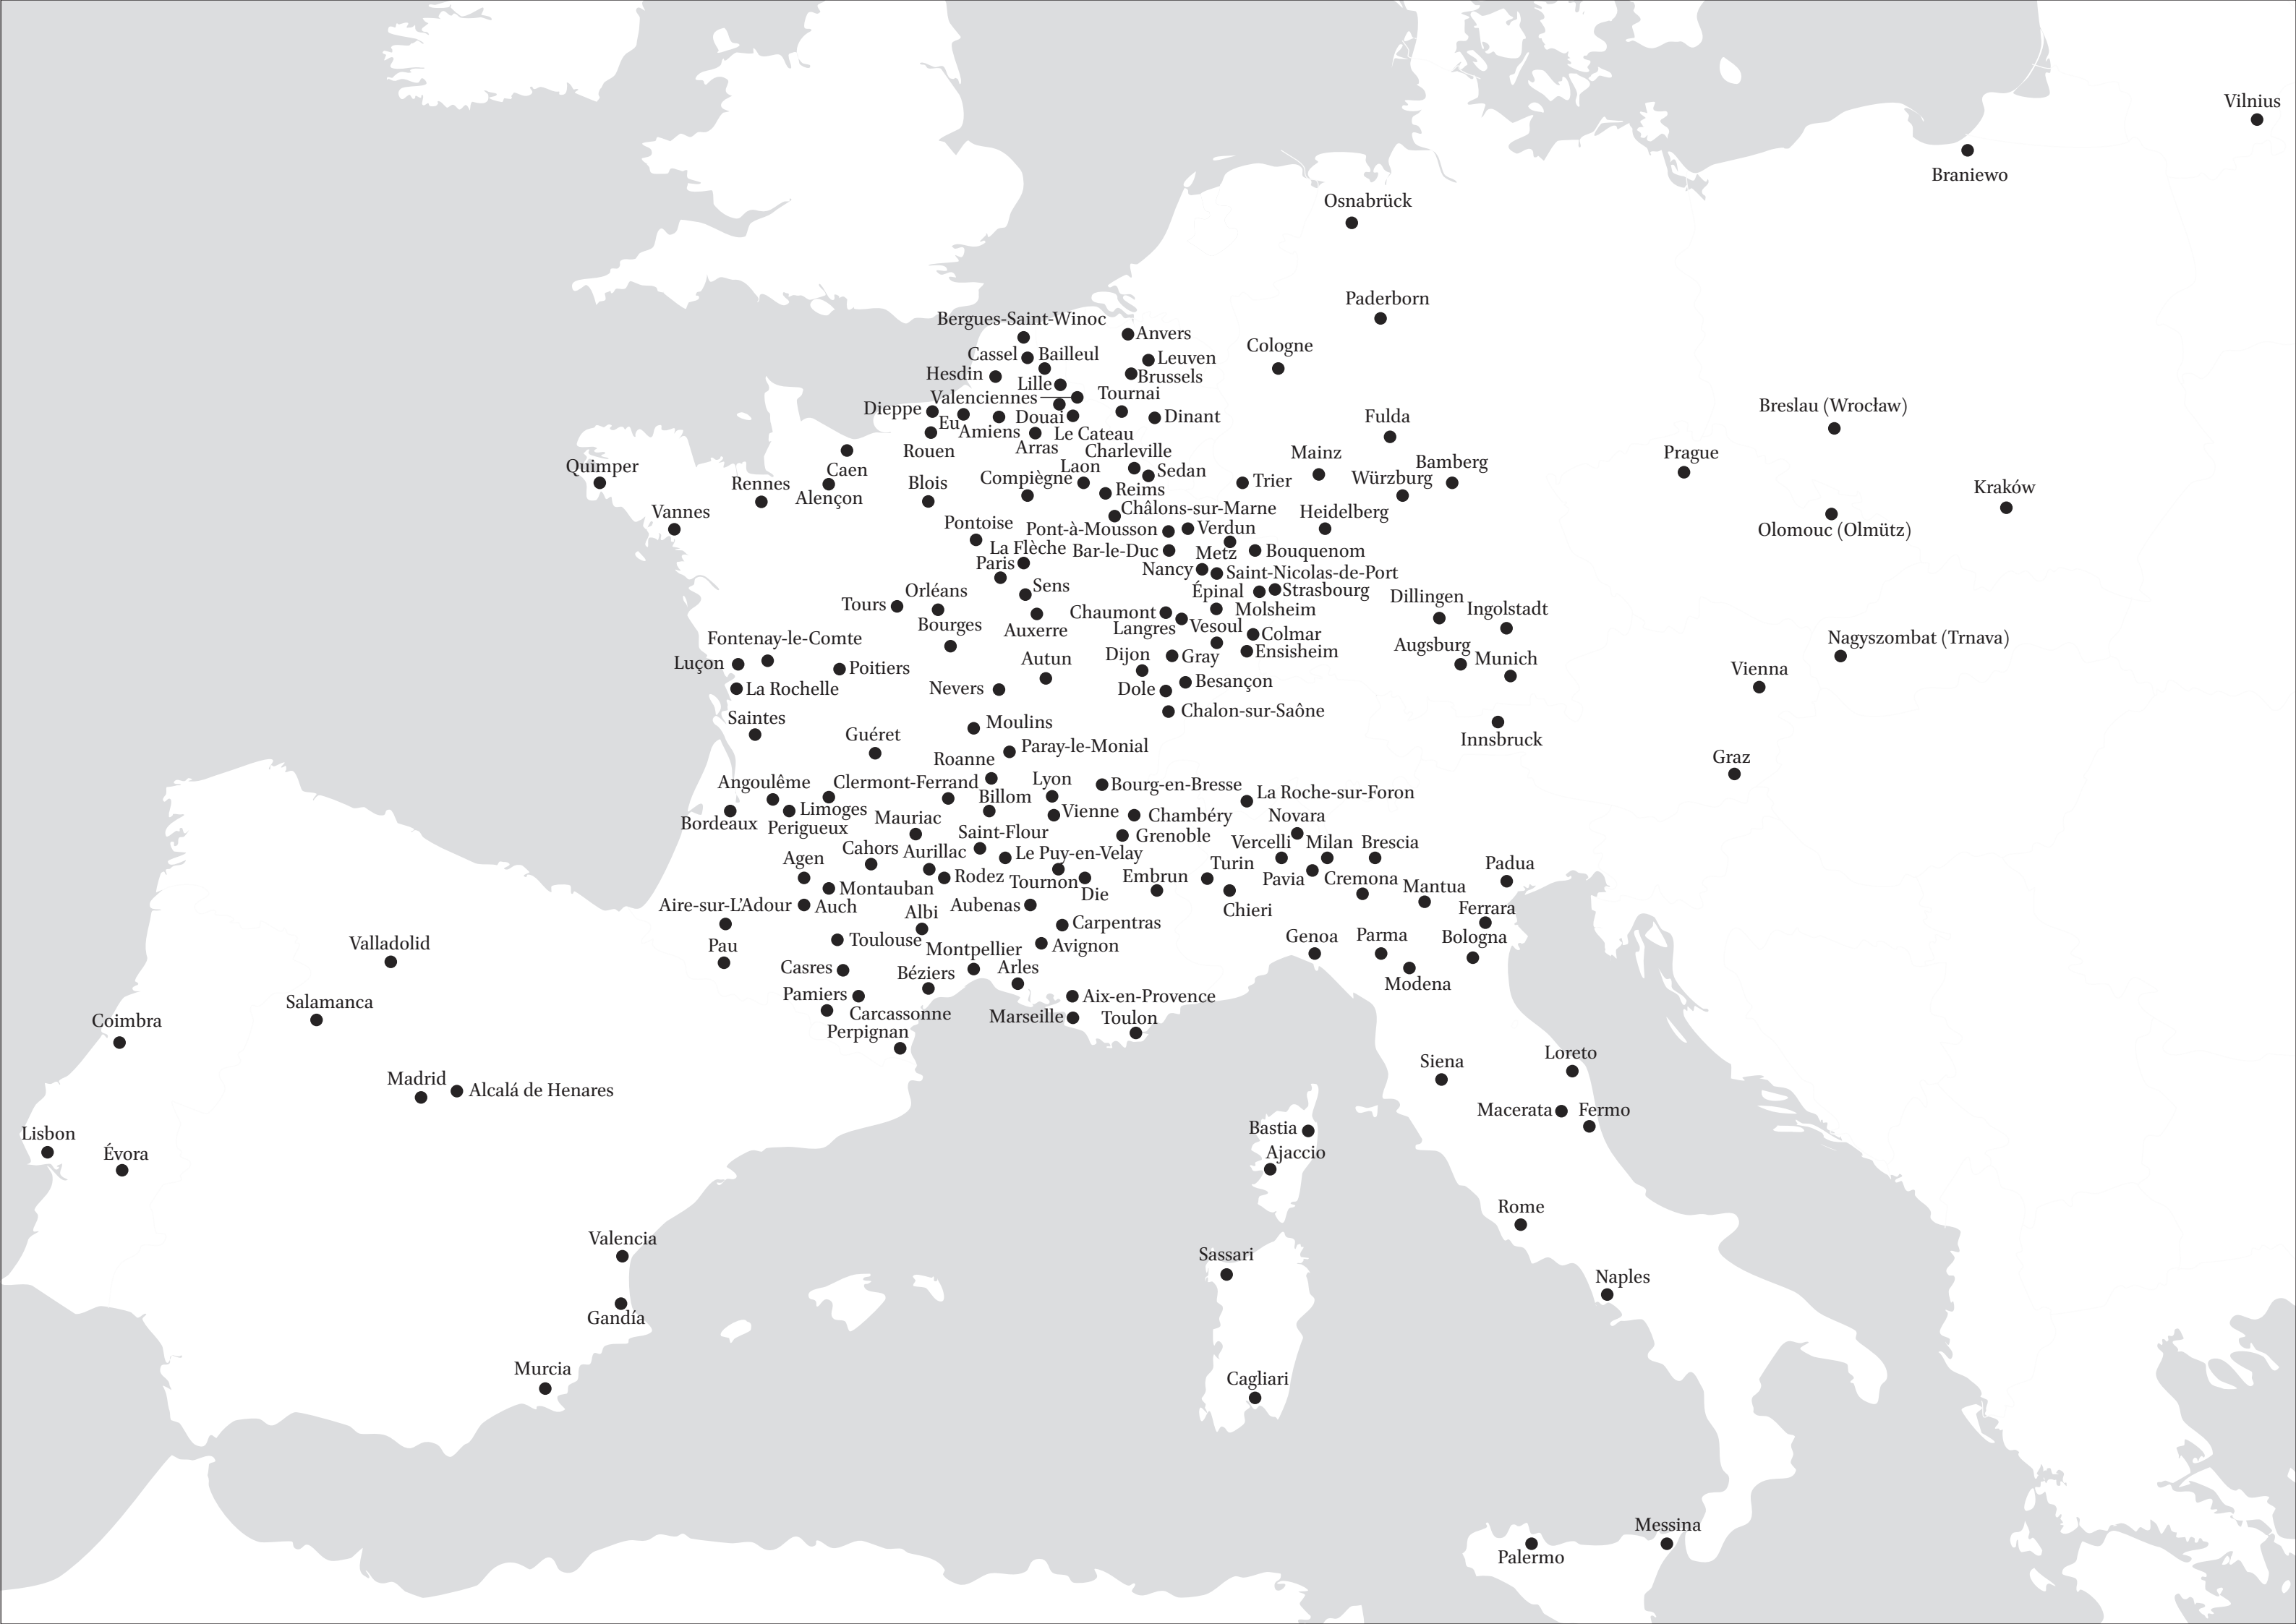

Supplement: Supplementary file 3 [file 1]
